# Supplementary material for: Genomic Analysis of Two Cold-Active Pseudoalteromonas Phages Isolated from the Continental Shelf in the Arctic Ocean
Source: MDPI journal article supplement (doi:10.3390/v15102061), 2023-10-07
Supplement: s1 [file s1]

## Supplementary Materials

**Table S1.** Relationship of phage ACA1 proteins in % identity to phage ACA2, P2-like phages C5a, HP1 and P2; and to members of genus *VHMLvirus*.

| ACA1 gp | Function                    | P2 homol. | %ID ACA2 | C5a homol. | %ID C5a | HP1 HMM <sup>a</sup> | %ID HP1 | P2 HMM <sup>a</sup> | %ID P2 | <i>VHMLvirus</i> | %ID <i>VHMLvirus</i> |
|---------|-----------------------------|-----------|----------|------------|---------|----------------------|---------|---------------------|--------|------------------|----------------------|
| 1       | Antireceptor                |           | 100      |            |         |                      |         |                     |        |                  |                      |
| 2       |                             |           | 100      |            |         |                      |         |                     |        |                  |                      |
| 3       |                             |           | 100      |            |         |                      |         |                     |        |                  |                      |
| 4       | SOS protease                |           | 100      | gp4        | 95      |                      |         |                     |        |                  |                      |
| 5       |                             |           | 100      | gp5        | 97      |                      |         |                     |        |                  |                      |
| 6       |                             |           | 100      | gp6        | 99      |                      |         |                     |        |                  |                      |
| 7       |                             |           | 100      | gp7        | 95      |                      |         |                     |        |                  |                      |
| 8       |                             |           | 100      | gp10       | 59      |                      |         |                     |        |                  |                      |
| 9       | immunity repressor          | gpC       | 100      | gp11       | 66      | P51704               | 14      | 2XCJ_B              | 36     |                  |                      |
| 10      | excisionase                 |           | 100      | gp12       | 51      |                      |         |                     |        |                  |                      |
| 11      | transcription factor        | Cox       | 100      | gp13       | 98      | P51705               | 13      | 4LHF_A              | 18     |                  |                      |
| 12      |                             |           | 100      | gp14       | 96      |                      |         |                     |        |                  |                      |
| 13      | helicase loader             | gpB       | 100      | gp15       | 56      | P51707               | 18      | P07696              | 20     |                  |                      |
| 14      | DNA methylase               |           | 100      | gp17       | 60      | P51715               | 17      |                     |        |                  |                      |
| 15      |                             |           | 100      |            |         |                      |         |                     |        |                  |                      |
| 16      |                             |           | 100      | gp18       | 92      |                      |         |                     |        |                  |                      |
| 17      | repl. initiator             | gpA       | 100      | gp19       | 43      | P51711               | 29      | Q06419              | 32     |                  |                      |
| 18      |                             |           | 100      | gp20       | 91      |                      |         |                     |        |                  |                      |
| 19      |                             |           | 100      |            |         |                      |         |                     |        |                  |                      |
| 20      | transcription factor        | Ogr       | 100      | gp22       | 96      |                      |         | P08762              | 23     |                  |                      |
| 21      | transcription factor (focB) |           | 100      |            |         |                      |         |                     |        |                  |                      |
| 22      |                             |           | 100      |            |         |                      |         |                     |        |                  |                      |
| 23      | holin                       |           | 100      |            |         |                      |         |                     |        |                  |                      |
| 24      | holin                       |           | 100      |            |         |                      |         |                     |        |                  |                      |

|     |                                           |                  |     |                   |    |                      |    |            |    |             |    |
|-----|-------------------------------------------|------------------|-----|-------------------|----|----------------------|----|------------|----|-------------|----|
| 25  | portal                                    | gpQ              | 100 | gp24              | 40 | P51717               | 39 | P25480     | 36 |             |    |
| 26  | Lg. terminase                             | gpP              | 100 | gp25              | 42 | P51718               | 38 | P25479     | 42 |             |    |
| 27  | protease/scaffold                         | gpO              | 100 | gp26              | 27 | P51719               | 31 | P25478     | 29 |             |    |
| 28  | MCP                                       | gpN              | 100 | gp27              | 31 | P51720               | 28 | 7JW1_B     | 35 |             |    |
| 29  | Sm. terminase                             | gpM              | 100 | gp29              | 22 | P51721               | 25 | P25476     | 18 |             |    |
| 30  | head completion                           | gpL              | 100 | gp30              | 26 | P51722               | 21 | P25475     | 17 |             |    |
| 31  | tail completion                           | gpR              | 100 | gp31              | 26 | P51723               | 23 | P36933     | 17 |             |    |
| 32  | tail completion                           | gpS              | 100 | gp32              | 37 | P51724               | 25 | P36934     | 26 |             |    |
| 33  | contractile sheath                        | gpFI             | 100 | gp33              | 37 | P51725               | 40 | P22501     | 11 |             |    |
| 34  | tail tube                                 | gpFII            | 100 | gp34              | 43 | P51726               | 41 | P22502     | 14 |             |    |
| 35  |                                           |                  | 100 |                   |    |                      |    |            |    |             |    |
| 36  | tail chaperone                            | gpE              | 100 | gp39              | 27 | P51730               | 29 |            |    |             |    |
| 36a | tail chaperone with programmed frameshift | gpE+E'           | 100 |                   |    |                      |    |            |    |             |    |
| 37  | tape measure                              | gpT              | 100 | gp40              | 44 | P51731               | 42 | O64314     | 19 |             |    |
| 38  | sheath initiator                          | gpW              | 100 | gp41              | 38 | P51732               | 37 | P51768     | 17 |             |    |
| 39  | baseplate                                 | gpJ              | 99  | gp42              | 36 | P51733               | 32 | P51767     | 17 |             |    |
| 40  | baseplate                                 | gpI              | 99  | gp43              | 31 | P51734               | 35 | P26701     | 15 |             |    |
| 41  | tail fiber                                | gpH              | 100 | gp44              | 28 | P51735               | 30 | P26700     | 18 |             |    |
| 42  | antireceptor                              |                  | 97  |                   |    |                      |    |            |    | VHML gp35   | 61 |
| 43  | Accessory variability determinant         |                  | 100 |                   |    |                      |    |            |    | VP58.5 gp19 | 81 |
| 44  | reverse transcriptase                     |                  | 100 |                   |    |                      |    |            |    | VP58.5 gp20 | 75 |
| 45  |                                           |                  | 98  |                   |    |                      |    |            |    | VHML gp37   | 62 |
| 46  |                                           |                  | 100 |                   |    | P51737               | 16 |            |    |             |    |
| 47  |                                           | gpU <sup>b</sup> | 100 | gp45              | 31 | P51738               | 31 | PF06995.14 | 15 |             |    |
| 48  | cell puncturing device mounting domain    | gpD              | 100 | gp45 <sup>c</sup> | 34 | P51739N <sup>d</sup> | 28 | P10312     | 10 |             |    |
| 49  | tail spike                                | gpV              | 100 | gp46              | 26 | P51739C              | 24 | 3QR8_A     | 11 |             |    |

|    |           |           |     |     |    |        |    |        |    |  |  |
|----|-----------|-----------|-----|-----|----|--------|----|--------|----|--|--|
| 50 |           |           | 100 |     |    |        |    |        |    |  |  |
| 51 | integrase | integrase | 100 | gp2 | 96 | P21442 | 18 | P36932 | 17 |  |  |

<sup>a</sup>%identities for HP1 or P2 are by HHpred matching to UniProt-SwissProt-viral70\_3\_Nov21, or Pfam if prefixed with PF, or pdb if the accession contains an underscore. Otherwise %IDs are as reported by BlastP.

<sup>b</sup>Homology of this protein to P2 gpU is uncertain.

<sup>c</sup>The homolog of P2 gpD was left out of the C5a annotation (33586..34275).

<sup>d</sup>In phage HP1, the homologs of P2 gpD and gpV are fused to a single polypeptide.

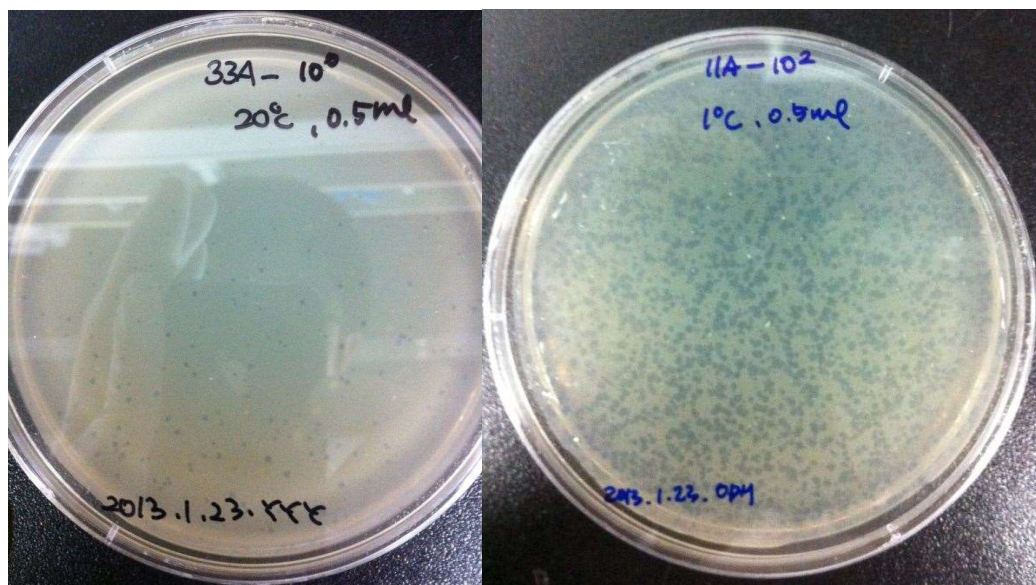

(a)

(b)

**Figure S1.** Plaque images of ACA1 (a) and ACA2 (b) on marine agar plates

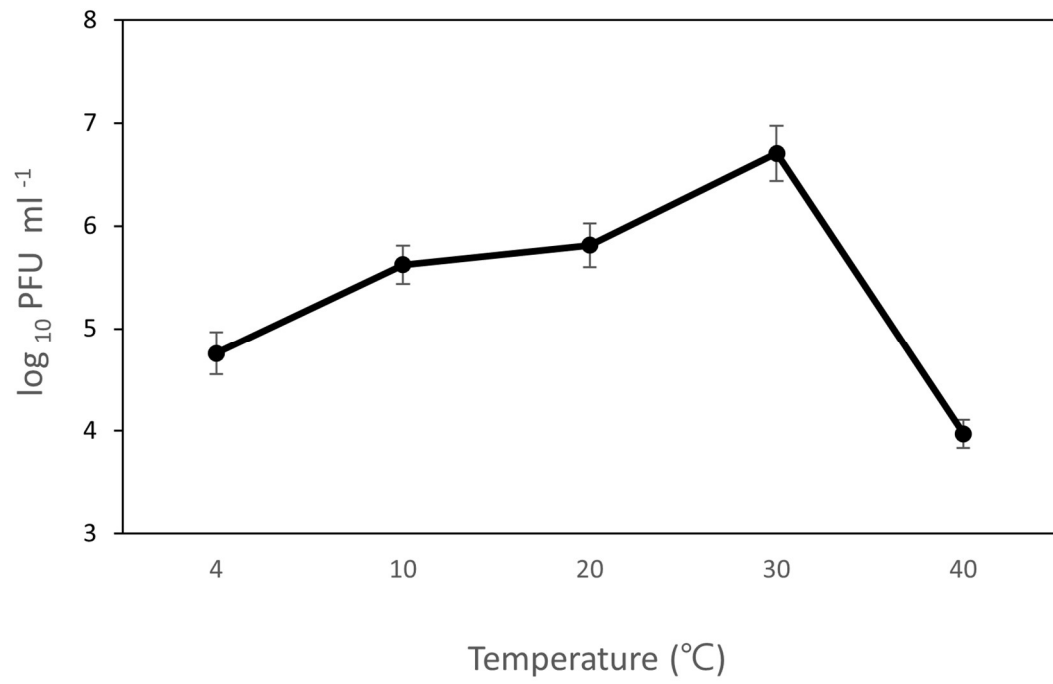

**Figure S2.** Phage production at different temperatures of phage ACA1. PFU; plaque forming unit

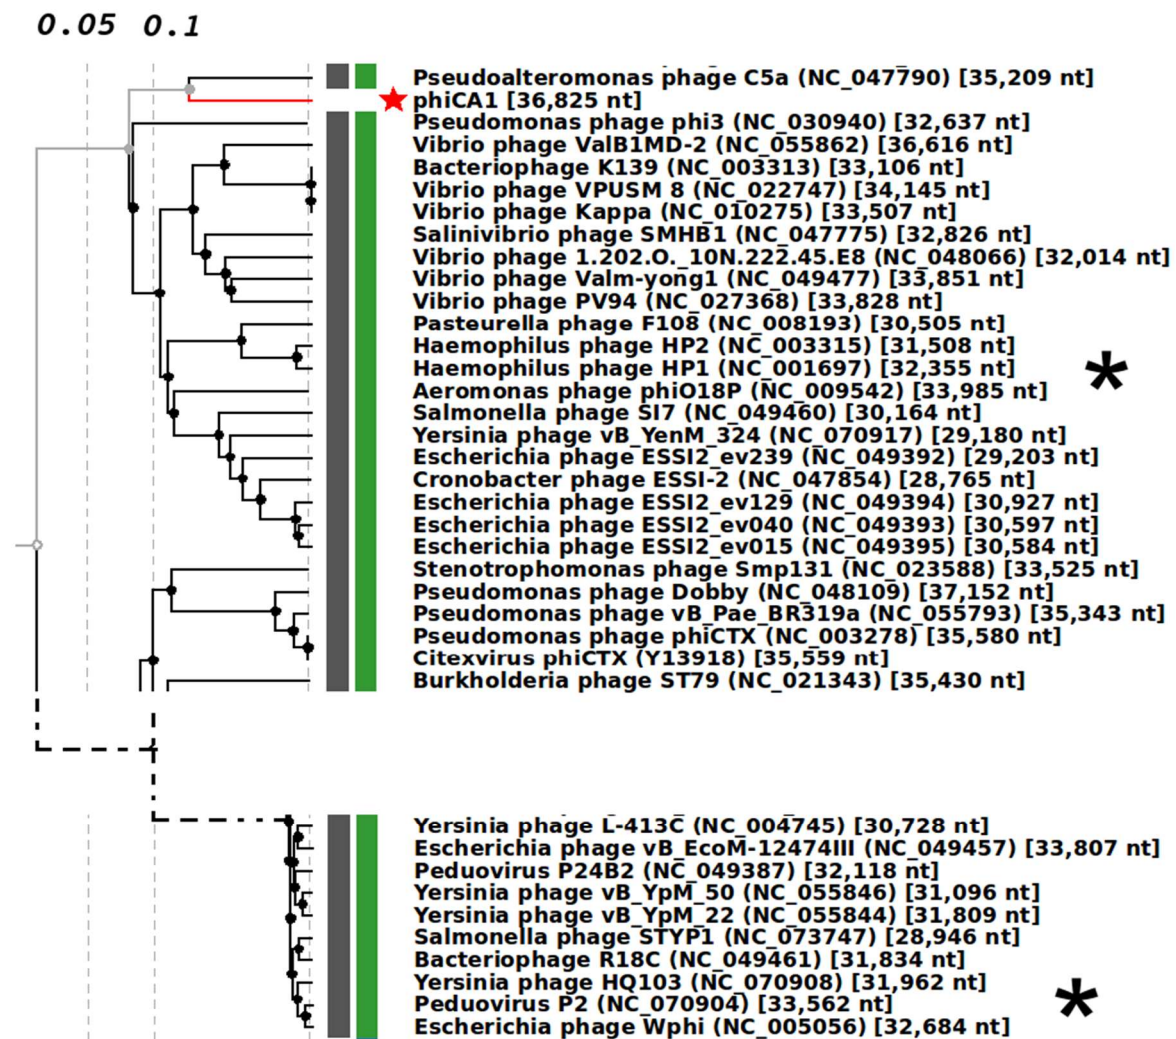

**Figure S3.** Segments from full proteome ViPtree with full reference sequence set showing placement of phage ACA1 near *Pseudoalteromonas* phage C5a, and within the HP1 subgroup within the larger *Peduoviridae* family. Prototypical phages HP1 and P2 representing the two large subgroups within *Peduoviridae* are marked with an asterisk.

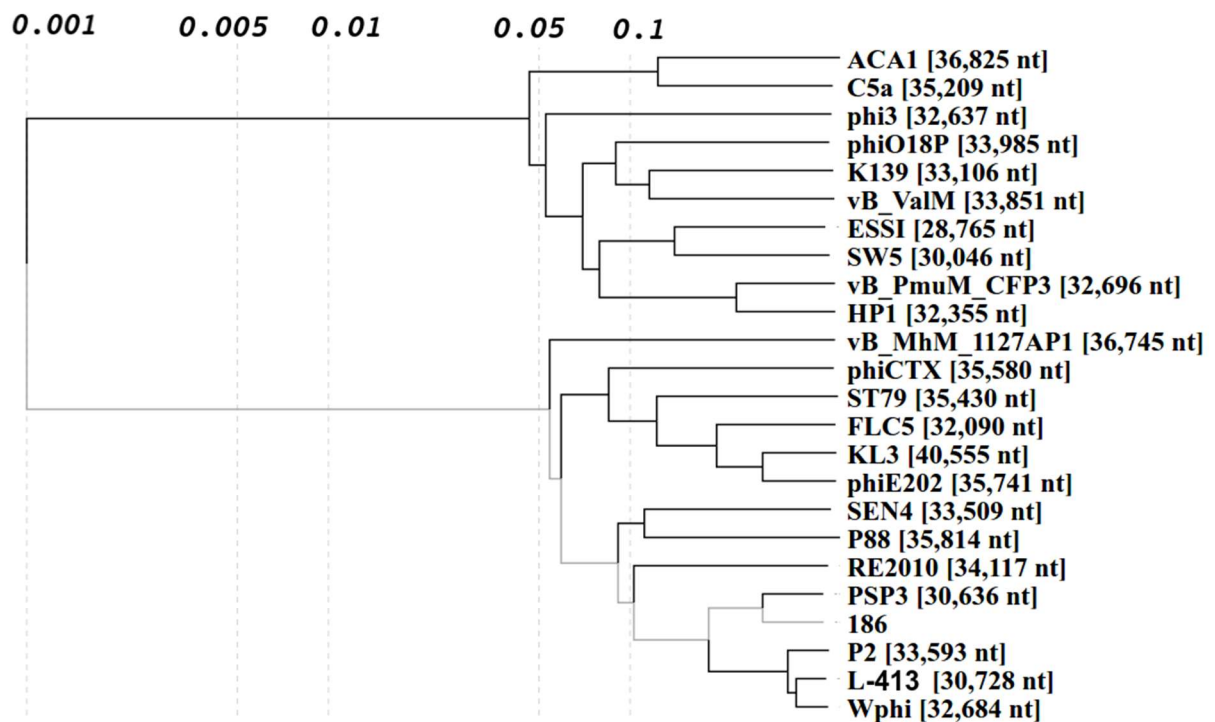

**Figure S4.** Whole proteomic ViPtree confined to just the exemplars used for single gene tree analysis in this paper. Other than the groups (P2, L-143, Wphi) and (PSP3, phage 186), all of these sequences represent different genera within *Peduviridae*. Note that the split between the P2 and HP1 subgroups appears much deeper when done in this way, for reasons unknown.

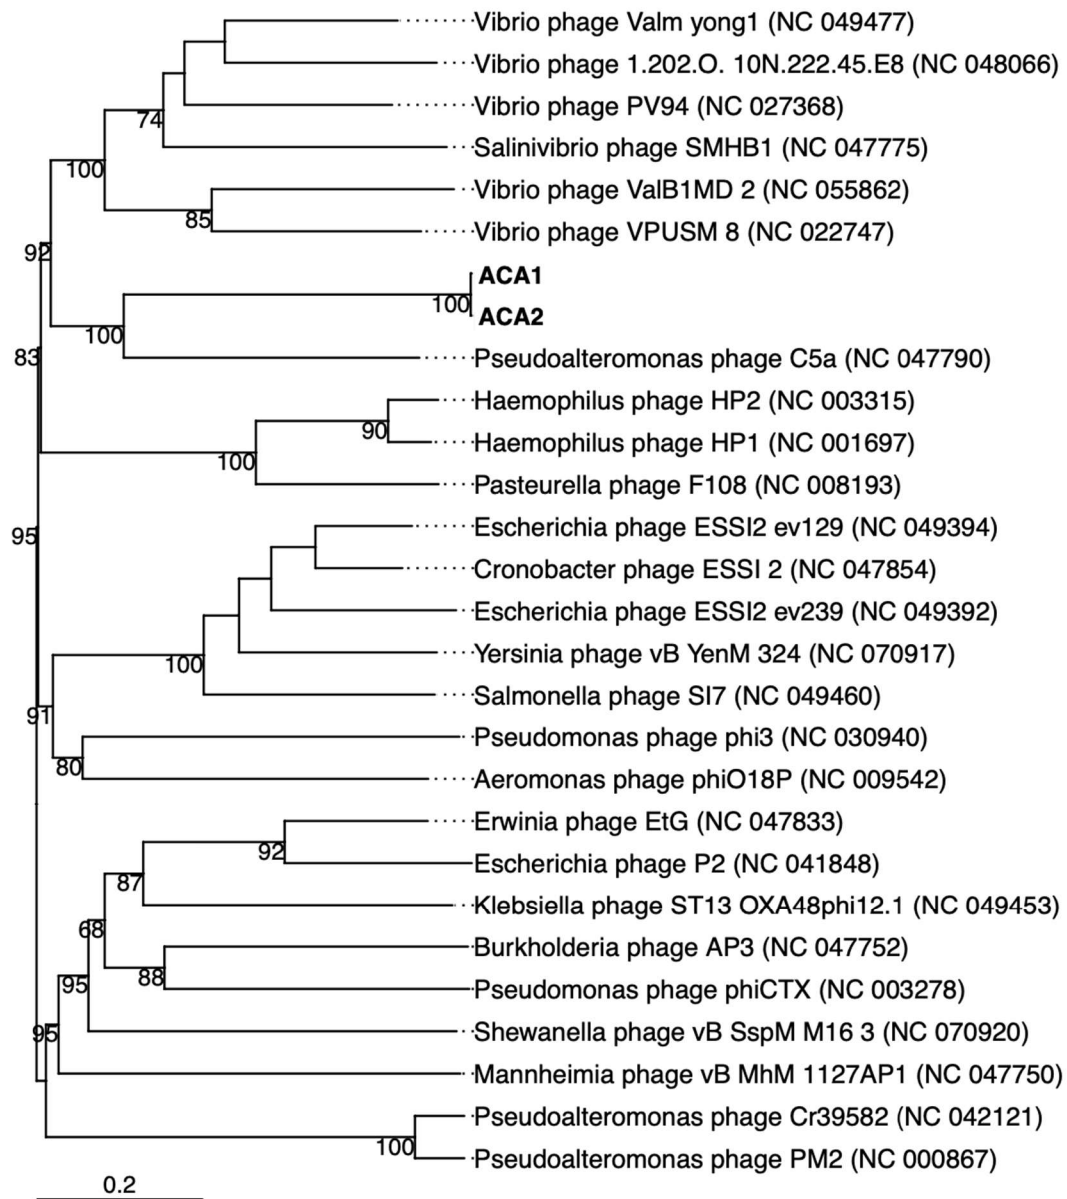

**Figure S5.** A whole genome-based VICTOR tree. The numbers above branches are GBDP pseudo-bootstrap support values from 100 replications.



**Table S2.** Mass spectroscopy of ACA1 virions.

| Protein | Function           | P2 homolog | MW (Kdal)         | %coverage | SC <sup>a</sup>   | SC/MW |
|---------|--------------------|------------|-------------------|-----------|-------------------|-------|
| gp25    | portal             | gpQ        | 37.1 <sup>b</sup> | 27        | 19 <sup>c</sup>   | 0.51  |
| gp27N   | protease           | gpO        | 16.1 <sup>b</sup> | 56        | 33                | 2.05  |
| gp27C   | scaffold           | gpO        | 16 <sup>b</sup>   |           | n.d. <sup>d</sup> |       |
| gp28    | MCP                | gpN        | 35.8              | 56        | 125               | 3.49  |
| gp30    | connector          | gpL        | 15.9              | 18        | 4                 | 0.25  |
| gp31    | connector          | gpR        | 17.1              | 15        | 2                 | 0.12  |
| gp32    | connector          | gpS        | 17                |           | n.d.              |       |
| gp33    | sheath             | FI         | 39                | 39        | 73                | 1.87  |
| gp34    | tail tube          | FII        | 16.2              | 24        | 4                 | 0.25  |
| gp35    | ?                  |            | 23.2              |           | n.d.              |       |
| gp37    | tape measure       | gpT        | 122.2             | 22        | 24                | 0.2   |
| gp38    | baseplate          | gpW        | 12.1              | 12        | 1                 | 0.08  |
| gp39    | baseplate          | gpJ        | 42.2              | 7         | 2                 | 0.05  |
| gp40    | baseplate          | gpI        | 30.1              | 17        | 7                 | 0.23  |
| gp41    | tail fiber         | gpJ        | 21.6              | 43        | 38                | 1.76  |
| gp42    | antireceptor       |            | 44.6              | 70        | 219 <sup>e</sup>  | 4.91  |
| gp46    | HP1 orf33          |            | 22.6              | 6         | 2                 | 0.09  |
| gp47    | baseplate?         | gpU?       | 17.5              |           | n.d.              |       |
| gp48    | cell punct. device | gpD        | 26                | 15        | 5                 | 0.19  |
| gp49    | cell punct. device | gpV        | 34.5              | 11        | 2                 | 0.06  |

<sup>a</sup>Spectrum Counts. A spectrum is counted if assigned with 95% confidence.

<sup>b</sup>Molecular weight adjusted based on predicted maturation cleavage by comparison to P2 homolog.

<sup>c</sup>A semitryptic peptide was detected corresponding to the predicted maturation cleavage.

<sup>d</sup>Not detected. All other proteins were not expected to be detected, and were not detected. A few proteins are explicitly listed as not detected because there was some plausible hypothesis that they might be virion components.

<sup>e</sup>There were six spectra detected in the variable region; and they were all of the proACA1-A specificity.

**Table S3.** Phage genus and host of P2-like genomes used in the timetree analysis.

| Phage               | Genus                        | Host                     |
|---------------------|------------------------------|--------------------------|
| <b>P2 subgroup</b>  |                              |                          |
| P2                  | <i>Peduovirus</i>            | <i>E. coli</i>           |
| phiE202             | <i>Tigrvirus</i>             | <i>Burkholderia</i>      |
| KL3                 | <i>Kayeltresvirus</i>        | <i>Burkholderia</i>      |
| ST79                | <i>Nampongvirus</i>          | <i>Burkholderia</i>      |
| FLC5                | <i>Kisquattuordecimvirus</i> | <i>Burkholderia</i>      |
| phiCTX              | <i>Citexvirus</i>            | <i>Pseudomonas</i>       |
| Wphi                | <i>Peduovirus</i>            | <i>E. coli</i>           |
| L-413C              | <i>Peduovirus</i>            | <i>E. coli</i>           |
| 186                 | <i>Eganvirus</i>             | <i>E. coli</i>           |
| PSP3                | <i>Eganvirus</i>             | <i>E. coli</i>           |
| RE2010              | <i>Felsduovirus</i>          | <i>Salmonella</i>        |
| P88                 | <i>Xuanwuvirus</i>           | <i>E. coli</i>           |
| SEN4                | <i>Senquatrovirus</i>        | <i>Salmonella</i>        |
| vB_MhM_1127AP1      | <i>Baylorvirus</i>           | <i>Mannheimia</i>        |
| <b>HP1 subgroup</b> |                              |                          |
| HP1                 | <i>Hpunavirus</i>            | <i>Haemophilus</i>       |
| ACA1                | not yet assigned             | <i>Pseudoalteromonas</i> |
| C5a                 | <i>Catalunyavirus</i>        | <i>Pseudoalteromonas</i> |
| Valm-yong1          | <i>Yongunavirus</i>          | <i>Vibrio</i>            |
| phi3                | <i>Phitrevirus</i>           | <i>Pseudomonas</i>       |
| vB_PmuM_CFP3        | <i>Irtavirus</i>             | <i>Pasteurella</i>       |
| SW5                 | <i>Irrigatiovirus</i>        | <i>Salmonella</i>        |
| ESSI-2              | <i>Seongnamvirus</i>         | <i>Cronobacter</i>       |
| phiO18P             | <i>Bielevirus</i>            | <i>Aeromonas</i>         |
| K139                | <i>Longwoodvirus</i>         | <i>Vibrio</i>            |

**Table S4.** Similarity of selected *Campylobacter* phage PC10 structural proteins to P2 subgroup structural proteins.

| Accession            | Function                  | % identity <sup>a</sup> to P2 protein | % identity to a closer phage protein |
|----------------------|---------------------------|---------------------------------------|--------------------------------------|
| <b>Tail proteins</b> |                           |                                       |                                      |
| QVW54053             | sheath                    | 22                                    |                                      |
| QVW54054             | tail tube                 | 21                                    |                                      |
| QVW54057             | tape measure              | 17                                    |                                      |
| QVW54049             | tail fiber (N-ter domain) | 31                                    |                                      |
| UWJ04572             | baseplate (gpI)           | 22                                    |                                      |
| <b>Head proteins</b> |                           |                                       |                                      |
| UWJ04524             | portal                    | 13                                    | HK97 25%                             |
| UWJ04514             | major capsid protein      | 11                                    | HK97 32%                             |

<sup>a</sup>Percent identity according to HHpred server.

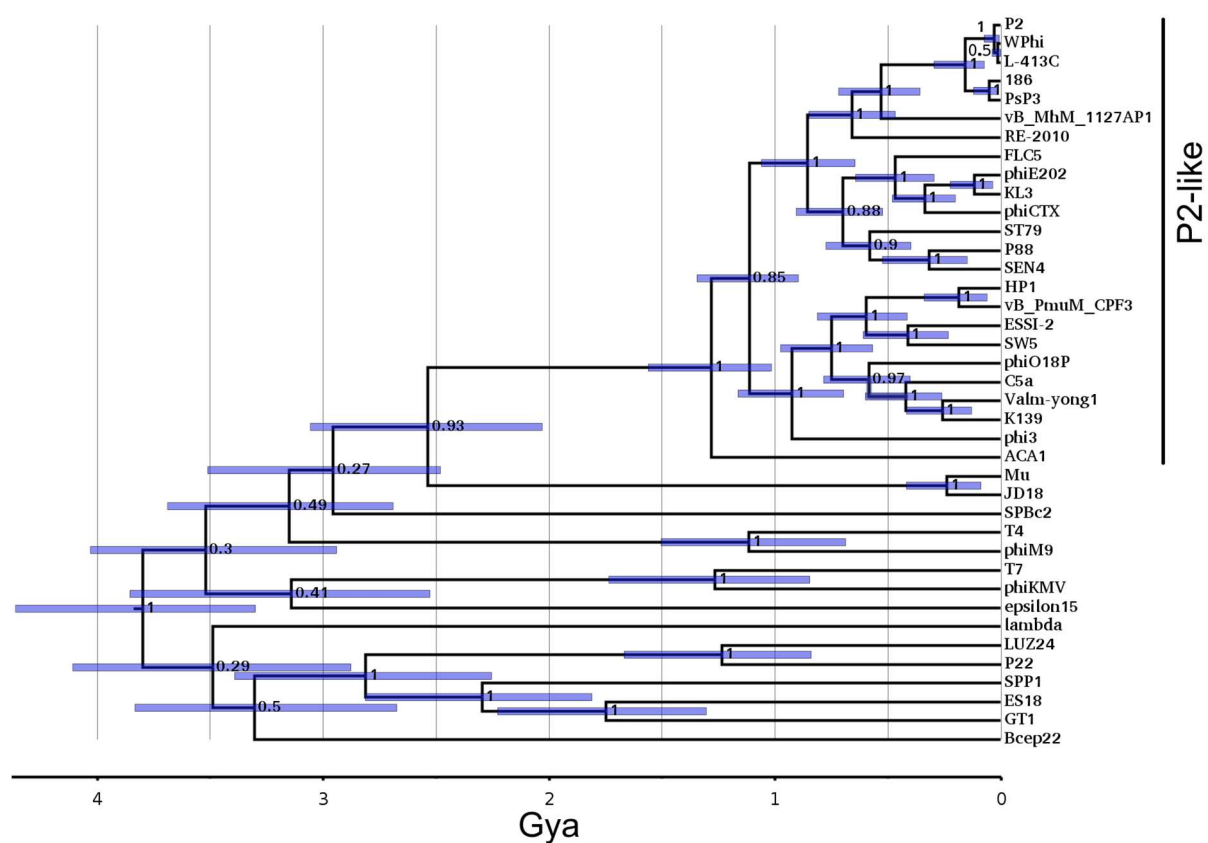

**Figure S6.** Timetree of P2-like large terminase proteins. The P2 phages used are summarized in Table S3. The time scale was formed by placing the root at 3.8 Gya. The tree is quite similar to the portal timetree.

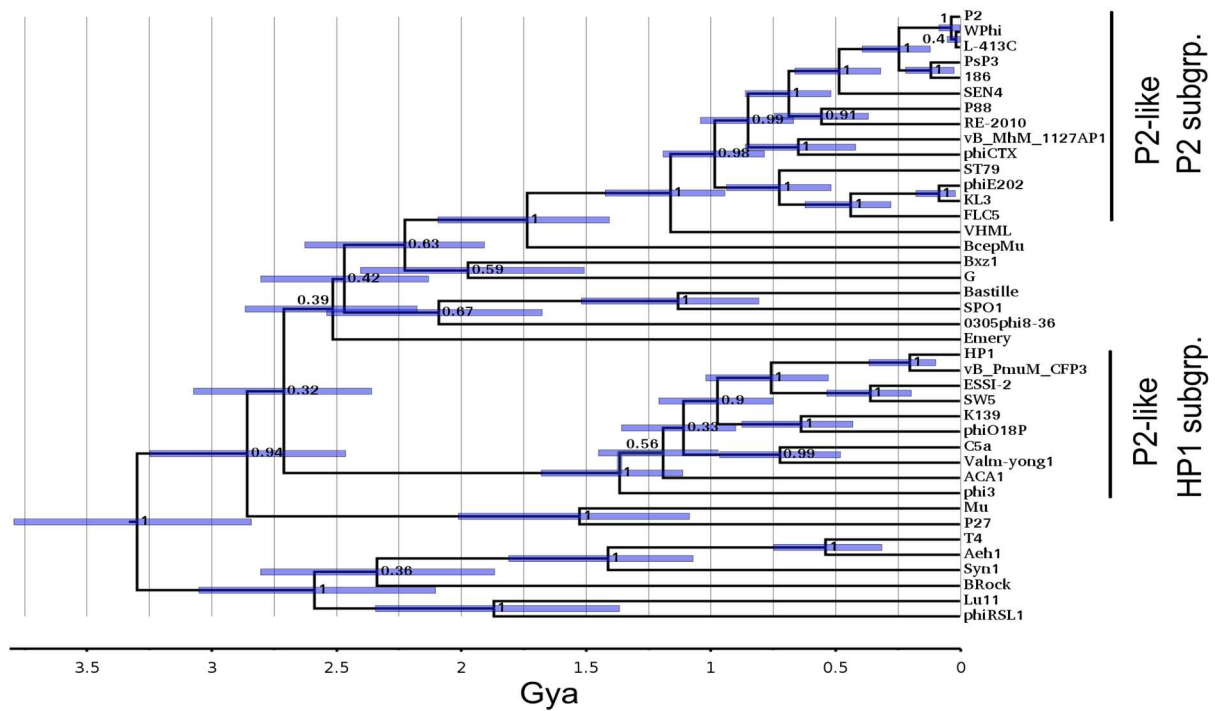

**Figure S7.** Timetree of P2-like gpJ baseplate proteins. The timescale was set by setting the radiation of the P2-like subgroup and the HP1-like subgroups to the same times as found for the sheath timetree. There is little evidence of recombination relative to the sheath tree within the P2-like phages. PC10, which had appeared high above the P2-like subgroup common ancestor does not have an identifiable homolog to this protein.

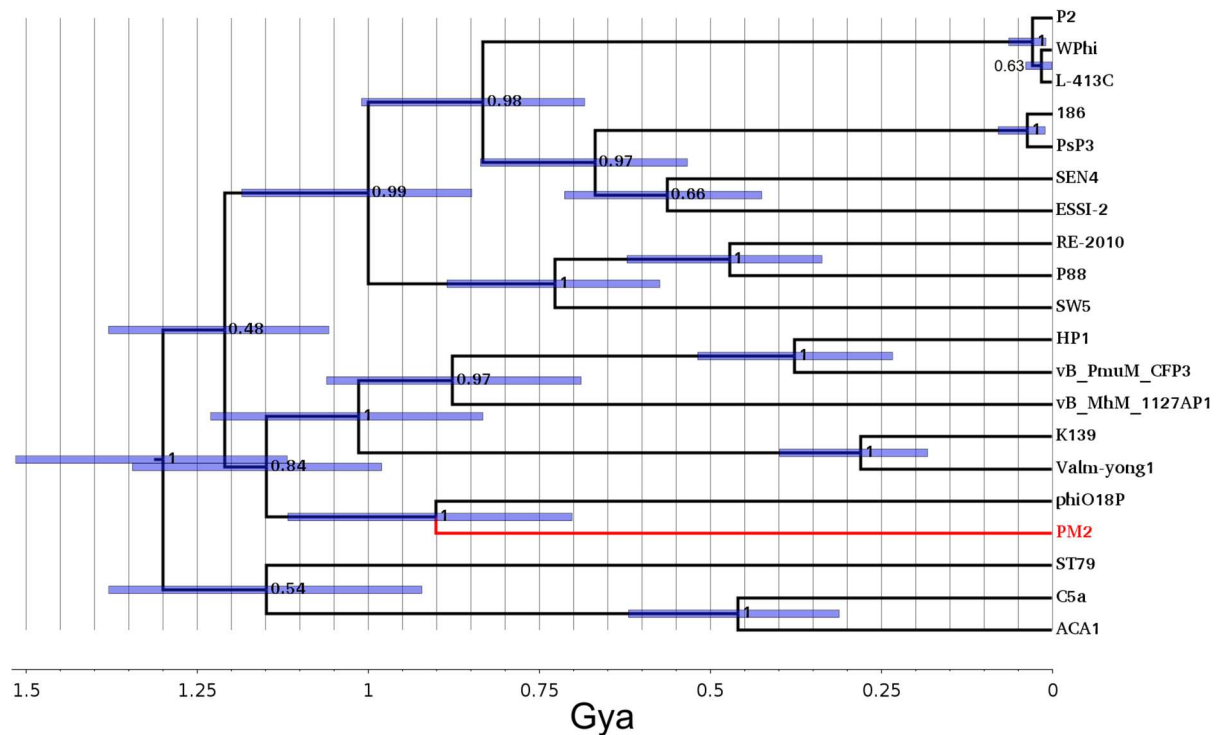

**Figure S8.** Timetree of P2-like repA proteins. This enzyme nicks the DNA to initiate replication. No homologs were found in non-P2-like tailed phages, although homologs in PM2 (in red) and related corticoviruses were found to be spawned from within the P2-like family. The P2 and HP1 subgroups are apparent, although there are some recombinations that exchanged this gene between the subgroups. Of the P2-like exemplars, FLC5, phiE202, KL3, phiCTX, and phi3 do not have homologs of this protein. This family is more distantly related to replication initiator proteins encoded in single stranded DNA phages and in some conjugative plasmids.

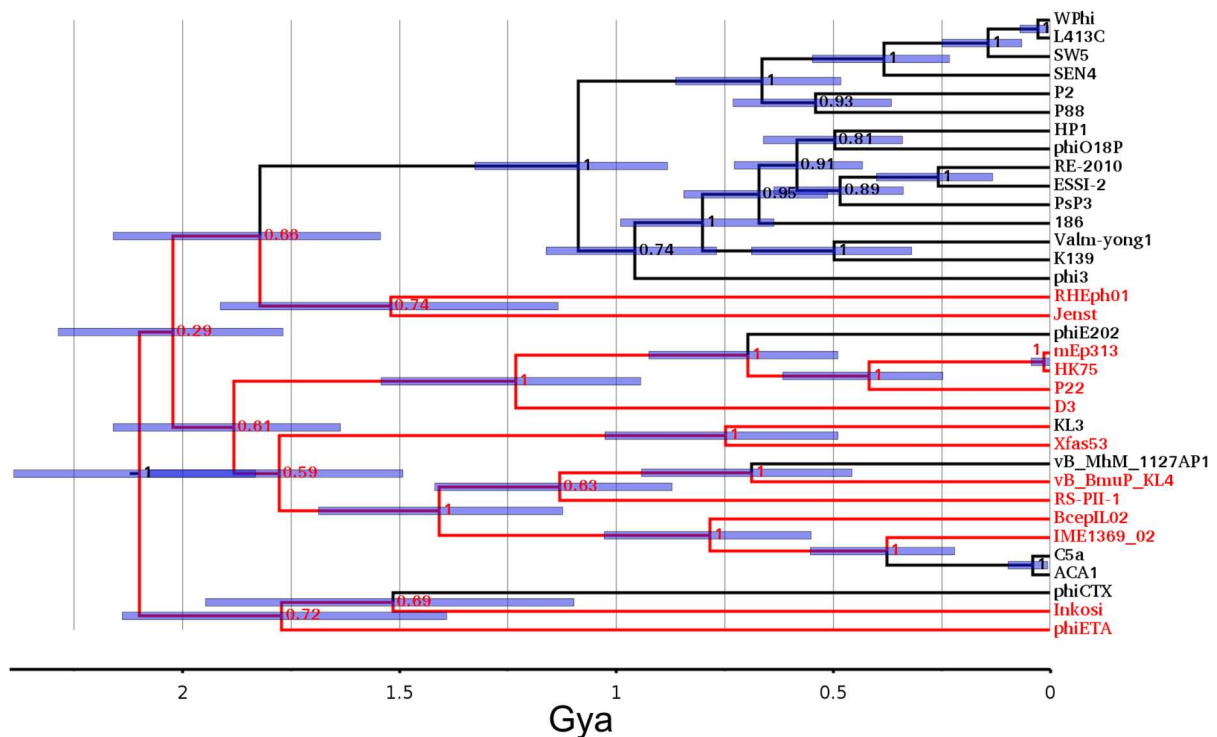

**Figure S9.** Timetree of integrases related to the ACA phages and P2-like phages. The integrase is among the most similar of the ACA phage proteins to *Pseudoalteromonas* C5a. P2-like phages are in black; the most closely related non-P2-like phages are in red. The time scale was set by placing the radiation of the main collection of P2-like phages at the same time as in the other trees. P2 and HP1 subgroups are still in evidence, but there is more extensive interchange between the subgroups than seen in the other trees. Some P2-like phages, including the ACA phages, have acquired a homolog from a different lineage than the one apparently supplying the common ancestor of the main P2-like group. In addition, of the P2-like exemplars listed in Table S3, FLC5 and ST79 did not have an identifiable homolog of this integrase.
